# Supplementary material
Source: Springer Nature journal article supplement (https://www.springermedizin.de/resource/supplementary/13000_2009_221_MOESM1_ESM.pdf/9624100)

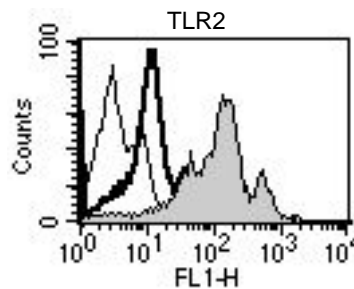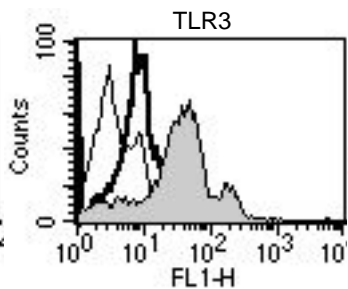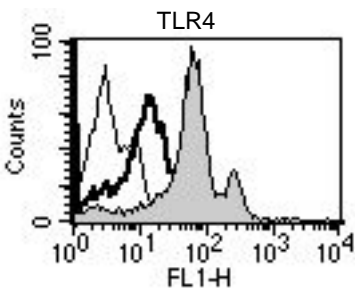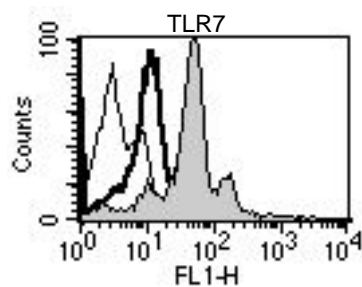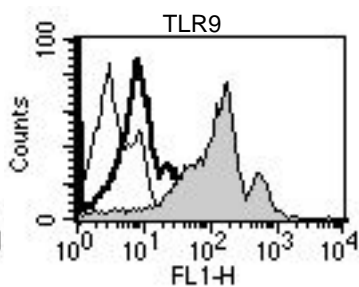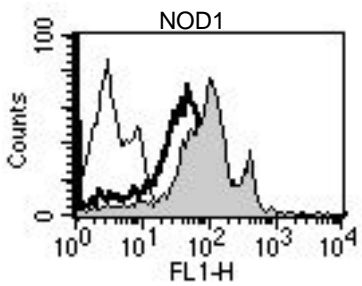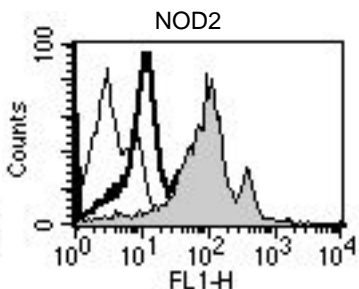

Supplement: MOESM1 [file 9624100]
